1 A retrospective longitudinal study of adenovirus group F, norovirus GI and GII, rotavirus, and  
2 enterovirus nucleic-acids in wastewater solids at two wastewater treatment plants: Solid-liquid  
3 partitioning and relation to clinical testing data

4  
5 Alexandria B. Boehm<sup>1\*</sup>, Bridgette Hughes<sup>2</sup>, Dorothea Duong<sup>2</sup>, Niaz Banaei<sup>3</sup>, Bradley J. White<sup>2</sup>,  
6 Marlene K. Wolfe<sup>4</sup>

- 7  
8 1. Department of Civil & Environmental Engineering, School of Engineering and Doerr  
9 School of Sustainability, Stanford University, 473 Via Ortega, Stanford, CA, USA  
10 2. Verily Life Sciences LLC, South San Francisco, CA, USA  
11 3. Stanford Health Care Clinical Microbiology Laboratory, Stanford University, School of  
12 Medicine, Palo Alto, CA, USA  
13 4. Gangarosa Department of Environmental Health, Rollins School of Public Health, Emory  
14 University, 1518 Clifton Rd, Atlanta, GA, USA

15  
16  
17  
18 \* Author to whom correspondence should be addressed. Email: [aboehm@stanford.edu](mailto:aboehm@stanford.edu), Tel:  
19 650-724-9128  
20

21  
22  
23  
24  
25  
26  
27  
28  
29  
30  
31  
32  
33  
34  
35  
36  
37  
38  
39  
40  
41  
42  
43  
44  
45  
46  
47

**Abstract**

**Background:** Enteric infections are important causes of morbidity and mortality, yet clinical surveillance is limited. Wastewater-based epidemiology (WBE) has been used to study community circulation of individual enteric viruses and panels of respiratory diseases, but there is limited work studying concurrent circulation of a suite of important enteric viruses.

**Methods:** A retrospective WBE study was carried out at two wastewater treatment plants located in California, United States. Using droplet digital polymerase chain reaction (PCR), we measured concentrations of human adenovirus group F, enteroviruses, norovirus genogroups I and II, and rotavirus nucleic-acids in wastewater solids two times per week for 26 months (n=459 samples) between 2/1/21 and 4/14/23. A novel probe-based PCR assay was developed and validated for adenovirus. We compared viral nucleic-acid concentrations to positivity rates for viral infections from clinical specimens submitted to a local clinical laboratory to assess concordance between the data sets.

**Findings:** We detected all viral targets in wastewater solids. At both wastewater treatment plants, human adenovirus group F and norovirus GII nucleic-acids were detected at the highest concentrations (median concentrations greater than  $10^5$  cp/g), while rotavirus RNA was detected at the lowest concentrations (median on the order of  $10^3$  cp/g). Rotavirus, adenovirus group F, and norovirus nucleic-acid concentrations were positivity associated with clinical specimen positivity rates. Concentrations of tested viral nucleic-acids exhibited complex associations with SARS-CoV-2 and other respiratory viral nucleic-acids in wastewater, suggesting divergent transmission patterns.

48 **Interpretation:** This study provides evidence for the use of wastewater solids for the sensitive  
49 detection of enteric virus targets in WBE programs aimed to better understand the spread of  
50 enteric disease at a localized, community level without limitations associated with testing many  
51 individuals. Wastewater data can inform clinical, public health, and individual decision making  
52 aimed to reduce transmission of enteric disease.  
53

## 54 **Introduction**

55

56 Infectious diseases are leading causes of morbidity and mortality<sup>1</sup>, and climate change may  
57 exacerbate the spread of critical and emerging diseases<sup>2</sup>. Diarrheal illness, in particular, is a  
58 leading cause of morbidity and mortality especially for children<sup>3</sup>. Enteric viruses, including  
59 human noroviruses, adenoviruses, enteroviruses, and rotavirus, are responsible for a large  
60 percentage of diarrheal illnesses<sup>4,5</sup>. Unfortunately, there is limited data on the incidence and  
61 prevalence of enteric viral infections and their etiologies in most of the world. Data that do exist  
62 are biased to severe cases, or individuals with comorbidities, and are often limited to syndromic  
63 data on GI symptoms that are non-specific. This limits the ability to inform prevention and  
64 response activities, including vaccine development, vaccination campaigns, pharmaceutical and  
65 non-pharmaceutical interventions.

66

67 Wastewater-based epidemiology (WBE) is emerging as a tool for assessing population-level  
68 disease occurrence. Wastewater contains excretions from individuals that enter drains and  
69 toilets including feces, urine, sputum, mucus and saliva. When individuals are infected by a  
70 pathogen, that pathogen or its components (nucleic-acids and proteins) can be excreted and  
71 enter wastewater. When wastewater is collected at a wastewater treatment plant (WWTP), it  
72 represents a composite sample of all the people in the sewershed (anywhere from  $\sim 10^4$  -  $10^6$   
73 individuals). This includes even infected and shedding individuals who are asymptomatic or  
74 mildly symptomatic and those who do not seek or receive medical care. Results regarding  
75 presence and concentration of infectious disease targets can be available 24 hours after sample  
76 collection. Therefore, WBE data can be complementary to clinical data by providing rapid results  
77 at a community scale and may even provide early warnings of disease spread. Work to date  
78 suggests that wastewater monitoring are related to community disease levels and can be used

79 to detect occurrence of important respiratory<sup>6,7</sup>, enteric<sup>8,9</sup>, and emerging and outbreak  
80 infections<sup>10,11</sup>.

81  
82 Wastewater is a mixture of liquids (water, urine, and other liquids), and solids or particles (feces,  
83 food, cells, and other material). Viruses tend to partition to the solids in wastewater, where their  
84 concentrations can be orders of magnitude higher than in the liquid on a mass equivalent  
85 basis<sup>12,13</sup>. It has been proposed that using wastewater solids can provide sensitive  
86 measurements for WBE applications, but the affinity of enteric viruses to wastewater solids in  
87 WBE applications has not been previously described.

88  
89 The goal of this study is to test the utility of WBE for a suite of enteric viral pathogens. We  
90 conduct a retrospective study to measure concentrations of enteric virus nucleic-acids in two  
91 samples each week of wastewater solids samples over 26 months from two wastewater  
92 treatment plants in the San Francisco Bay Area of California, US. In particular, we measured  
93 concentrations of human adenovirus group F, rotavirus, human norovirus GI and GII, and  
94 enterovirus nucleic-acids. These viruses were chosen for the study because they represent  
95 some of the most important etiologies of enteric viral infections globally<sup>3,4</sup>. In addition, we  
96 measured these targets in both the solids and liquid fractions of wastewater to assess their  
97 affinity to the solid matrix. Finally, we test whether wastewater concentrations of enteric virus  
98 nucleic-acids are associated with positivity rates from clinical samples from a local diagnostic  
99 laboratory.

100

## 101 **Methods**

102

103 **(RT-)PCR assays.** We used previously published assays for rotavirus<sup>14</sup>, human norovirus  
104 (HuNoV) GI<sup>15</sup> and GII<sup>16</sup>, and enteroviruses (EV)<sup>17</sup>. We designed novel PCR primers and an

105 internal hydrolysis probe for adenovirus group F (HAdV). HAdV genome sequences were  
106 downloaded from National Center for Biotechnology Information (NCBI) in April 2022 and  
107 aligned to identify conserved regions. Primers and probes were developed *in silico* using  
108 Primer3Plus (<https://primer3plus.com/>). Parameters used in assay development are provided in  
109 Table S1. All primers and probe sequences (Table S2) were screened for specificity *in silico* and  
110 *in vitro* against virus panels and genomic and synthetic target nucleic-acids (appendix p 2,  
111 Table S3). We also used previously published assays for the SARS-CoV-2<sup>18</sup>, and pepper mild  
112 mottle virus M gene (PMMoV)<sup>2</sup>.

113  
114 **Study design and sample collection.** This study is an observational, retrospective longitudinal  
115 surveillance study. Two WWTPs that serve 75% (1,500,000 people) of Santa Clara County, (SJ)  
116 and 25% (250,000 people) of San Francisco County (OSP), California were included in the  
117 study (Figure S1). Further WWTP descriptions are elsewhere<sup>19</sup>.

118  
119 Wastewater solids samples were collected daily for a prospective WBE effort beginning  
120 November 2020 and stored, and a subset of those samples (two samples per week, 459  
121 samples total) are used in this study. The samples were chosen to span a 26 month period  
122 (2/1/21 - 4/14/23) spanning different phases of the COVID-19 pandemic.

123  
124 To compare concentrations of enteric virus nucleic-acids in liquid wastewater and wastewater  
125 solids, eight samples of settled solids and 24-hour composited influent were collected from OSP  
126 from the primary clarifier and the inlet to the plant, respectively, on July 11, 13-16, 17, 18, and  
127 21, 2023 (n=8, hereafter labeled as samples 1-8) using clean sterile containers.

128  
129 **Procedures.** For the retrospective study, 50 mL of wastewater solids were collected using  
130 sterile technique in clean bottles from the primary clarifier. At SJ, twenty-four hour composite

131 samples were collected by combining grab samples from the sludge line every six hours. At  
132 OSP, a grab sample was collected from the sludge line. Samples were stored at 4°C,  
133 transported to the lab, and processed within six hours. Solids were dewatered<sup>20</sup> and frozen at -  
134 80°C for 4 - 60 weeks. Frozen samples were thawed overnight at 4°C and then nucleic-acids  
135 were obtained from the dewatered solids following previously published protocols<sup>18,21</sup>. Nucleic-  
136 acids were obtained from 10 replicate sample aliquots. Each replicate nucleic-acid extract from  
137 each sample was subsequently stored between 8 and 273 days for SJ and between 1 and 8  
138 days for OSP at -80°C and subjected to a single freeze thaw cycle. Upon thawing, targets were  
139 measured immediately using digital droplet (RT-)PCR with multiplexed assays for SARS-CoV-2,  
140 rotavirus, HAdV, HuNoV GI, HuNoV GII, EV, and PMMoV. PMMoV is highly abundant in human  
141 stool and wastewater<sup>22</sup> and is used as an internal recovery and fecal strength control. Each  
142 nucleic-acid extract was run in a single well so that 10 replicate wells were run for each sample  
143 for each assay.

144  
145 In order to investigate potential losses from storage and freeze thaw of the samples and their  
146 nucleic-acid extracts, we compared measurements of the SARS-CoV-2 and PMMoV measured  
147 in the retrospective, longitudinal study obtained using the stored samples to measurements from  
148 the same samples that were not stored and analyzed prospectively for a regional monitoring  
149 effort (appendix p 3).

150  
151 For the wastewater liquid/solid comparison, influent and solids samples were transported to the  
152 laboratory on ice and stored at 4°C for 7 days during which time we expect minimal decay of  
153 nucleic-acid target based on experiments with other similar targets<sup>23</sup>. The solids were  
154 dewatered and processed exactly as described above for the retrospective samples. The  
155 influent samples were processed to obtain nucleic-acid as described previously<sup>10</sup>; 10  
156 subsamples were processed per sample (appendix p 2). Nucleic-acid templates were used

157 immediately (no storage) as template in multiplexed (RT-)PCR reactions for rotavirus, HAdV,  
158 EV, HuNoV GI, HuNoV GII, and PMMoV. Each subsample nucleic-acid extract was run in a  
159 single well so that 10 replicate wells were run for each sample for each assay.

160  
161 Further details of the dd(RT)-PCR, including the use of controls and thresholding, are described  
162 in the appendix (pp 2-3). We confirmed that multiplexing up to eight assays in a single reaction  
163 did not interfere with target quantification (appendix p 3). Concentrations of nucleic-acid targets  
164 were converted to concentrations in units of copies (cp)/g dry weight or per milliliter of liquid  
165 using dimensional analysis. The errors are reported as standard deviations. Three positive  
166 droplets across 10 merged wells corresponds to a concentration between ~500-1000 cp/g; the  
167 range in values is a result of the range in the equivalent mass of dry solids added to the wells,  
168 or 1 cp/ml for liquid.

169  
170 **Enteric virus infection positivity rate data.** Data are not gathered on incidence and  
171 prevalence of rotavirus, adenovirus group F, or norovirus infections in the US. As such, we use  
172 rotavirus, adenovirus group F, or norovirus clinical test positivity rates to infer information about  
173 the spread of disease. We used positivity rates from Stanford Health Care Clinical Microbiology  
174 Laboratory (“clinical laboratory”) for comparison to wastewater data. The clinical laboratory tests  
175 stool specimens of symptomatic patients for rotavirus, adenovirus group F, and HuNoV using  
176 the BIOFIRE GI panel (bioMérieux, Inc., Salt Lake City, UT). HuNoV testing included both GI  
177 and GII, but is not disaggregated. The clinical laboratory is among the largest in Santa Clara  
178 County, where SJ WWTP is located, and receives specimens from counties in the San  
179 Francisco Bay Area. We assumed that the positivity rates recorded at the clinical laboratory are  
180 reasonable estimates for the positivity rates for residents in the sewersheds. Positivity rates are  
181 aggregated weekly. Enteroviruses are a diverse group of viruses and there is no clinical testing  
182 data available that represents disease occurrence caused by enteroviruses in aggregate.



183

184 **Statistical analysis.** Data tended to be not normal, so non-parametric tests were used. We  
185 compared concentrations at SJ and OSP for each viral target using Mann-Whitney U tests (5  
186 tests total). We tested the null hypothesis that infection positivity rates are not associated with  
187 the nucleic-acids concentrations in wastewater solids at each WWTP (8 tests total) using  
188 Kendall's test of association; we used weekly aggregated positivity rate from the clinical  
189 laboratory, and average of the two weekly concentrations of viral nucleic-acids for the analysis.  
190 We tested the null hypothesis that nucleic-acid concentrations of each virus were not associated  
191 between the two WWTPs (5 tests total) using Kendall's test; since samples from the exact same  
192 day at SJ and OSP were not processed, we used the weekly average concentrations. We tested  
193 the null hypothesis that viral nucleic-acid concentrations were not associated within each  
194 WWTP (20 tests total) using Kendall's test. We used a p value of 0.0013 (0.05/38) for alpha=  
195 0.05 to account for multiple hypotheses testing. All analysis was carried out using RStudio  
196 (1.4.1106) and R (4.0.5).

197

198 **Ethics.** This study was reviewed by theStanford University Institutional Review Board (IRB) and  
199 the IRB determined that this research does not involve human subjects and is exempt from  
200 oversight.

201

## 202 **Results**

203

204 Results are reported as suggested in the Environmental Microbiology Minimal Information  
205 guidelines<sup>24</sup> (appendix p 4, Figure S2, Table S4). Extraction and (RT-)PCR negative and  
206 positive controls performed as expected (negative and positive, respectively). In the 459  
207 samples comprising the retrospective study, consistency of PMMoV measurements in samples  
208 within WWTP indicated no gross nucleic-acid extraction failures (appendix pp 3-4). Comparison

209 of SARS-CoV-2 and PMMoV measurements made on unstored samples to those used in this  
210 retrospective study that were stored, and for which the nucleic-acid underwent one freeze-thaw  
211 gave equivocal results; PMMoV showed no degradation. However, median (IQR) ratios of  
212 measurements in stored and fresh samples was 0.2 (0.1-0.3) and 0.4 (0.2-0.6) for SJ and OSP,  
213 respectively, suggesting some degradation (appendix p 4). Although not ideal, storage of  
214 samples is essential for retrospective work.

215  
216 Results of *in silico* analysis indicated no cross reactivity of the enteric virus (RT-)PCR probe-  
217 based assays with sequences deposited in NCBI; *in vitro* testing against non-target and target  
218 viral nucleic-acids (Table S3) also indicated no cross reactivity. We multiplexed eight different  
219 assays in each PCR reaction. We found that the concentration of each target was not affected  
220 by the presence of orthogonal targets as background (Figure S3).

221  
222 Viral nucleic-acid concentrations in eight matched wastewater liquid and solid samples were  
223 orders of magnitude higher in the solids compared to the liquid wastewater, on a per mass basis  
224 (Figures 1 and S4). The distribution coefficients,  $K_d$ , defined as the ratio of nucleic-acids  
225 concentrations in solids to liquids, in decreasing rank order of medians (IQR) are: EV  $K_d$  26000  
226 ml/g (12300-28700), HuNoV GI  $K_d$  24400 ml/g (9800-28900), HuNoV GII  $K_d$  16100 ml/g (10000-  
227 22400); HAdV  $K_d$  6700 ml/g (14600-13200); PMMoV  $K_d$  3700 ml/g (3400-4400); and rotavirus  $K_d$   
228 650 (400-980). Given the observed enrichment of viral targets in wastewater solids, it is justified  
229 to use the solid matrix for prospective wastewater monitoring for infectious disease targets.

230  
231 The retrospective, longitudinal study detected EV, HAdV, rotavirus, and HuNoV GI and GII  
232 nucleic-acids in wastewater solids (Figures 2 and S5) throughout the study with most showing  
233 some cyclic, season patterns with higher concentrations in winter/spring periods. Median  
234 concentrations of each enteric viral target were significantly higher at SJ relative to OSP (Mann-

235 Whitney U Test, all  $p < 0.001$ ) for all viral targets except for HuNoV GII, but the effect size was  
236 less than 1 order of magnitude (Table 1). Within each WWTP, median concentrations of the  
237 different viruses ranked highest to lowest were HAdV (highest median concentration of  $5.8 \times 10^5$   
238 and  $1.9 \times 10^6$  cp/g for OSP and SJ, respectively) followed by HuNoV GII ( $5.7 \times 10^5$  and  $7.0 \times 10^5$   
239 cp/g for OSP and SJ, respectively), EV ( $4.1 \times 10^4$  and  $5.4 \times 10^4$  cp/g for OSP and SJ,  
240 respectively), HuNoV GI ( $2.8 \times 10^4$  and  $3.4 \times 10^4$  cp/g for OSP and SJ, respectively), and rotavirus  
241 with the lowest ( $1 \times 10^3$  and  $3.3 \times 10^3$  cp/g for OSP and SJ, respectively). Other summary  
242 statistics (interquartile ranges, maximums and number of non-detects) generally follow the same  
243 pattern (Table 1).

244  
245 Between WWTPs, concentration of rotavirus, HAdV, and HuNoV GII nucleic-acids were  
246 positively associated (rotavirus  $\tau = 0.27$ ,  $p < 10^{-4}$ ; HAdV  $\tau = 0.49$ ,  $p < 10^{-13}$ ; HuNoV GII  $\tau =$   
247  $0.36$ ,  $p < 10^{-7}$ ) whereas HuNoV GI and EV concentrations were not correlated between WWTPs.  
248 Within SJ WWTP, the viral nucleic-acid concentrations were positively associated with each  
249 other ( $\tau$  between 0.25 and 0.6 depending on viral target, all  $p < 10^{-4}$ ) except that EV was not  
250 associated with rotavirus, HuNoV GII, or HuNoV GI nucleic-acid concentrations. Within OSP,  
251 rotavirus and HuNoV GI ( $\tau = 0.23$ ,  $p = 0.00036$ ), HuNoV GII and GI ( $\tau = 0.30$ ,  $p < 10^{-5}$ ), and  
252 HAdV and EV ( $\tau = 0.21$ ,  $p = 0.00079$ ) nucleic-acid concentrations were positively associated.

253  
254 Time series of enteric virus nucleic-acids in relation to SARS-CoV-2 RNA measured herein, and  
255 other respiratory virus nucleic-acids reported at SJ previously<sup>7</sup> are provided in Figure 3. At SJ,  
256 enteric virus nucleic-acid concentrations increased after the BA.1 surge starting on 2/1/22 and  
257 peaked contemporaneously near the BA.2 surge peak, and declined sharply after the BA.2  
258 surge. This is in contrast to the pattern observed for a suite of non-SARS-CoV-2 respiratory  
259 viruses (including parainfluenza, metapneumovirus, influenza, and coronaviruses) that peaked  
260 just prior to the BA.1 surge, and decreased sharply after, and then rose again during the BA.2

261 surge. At OSP, a local maxima in the enteric virus nucleic-acid concentrations occurs near the  
262 BA.2 surge, as observed at SJ, but thereafter, patterns for the different viruses diverge. HAdV  
263 and HuNoV GI remained relatively high for the duration of the time series after the BA.2 surge,  
264 while rotavirus and HuNoV GII concentrations were highest at the end of the time series (spring  
265 2023).

266  
267 The clinical laboratory processed a median (IQR) of 80 (66-89) samples per week. Median  
268 (IQR) positivity rates were lowest for rotavirus (0% (0-1.4%), max = 4.8%), intermediate for  
269 adenovirus group F (0 (0 -1.5%), max = 9.1%) and highest for HuNoV (4.8% (2.8-7.5%), max =  
270 18.0%). HAdV in wastewater solids at both WWTPs was positively correlated to adenovirus  
271 positivity rates ( $\tau = 0.30$  for OSP and  $0.38$  for SJ, both  $p < 10^{-4}$ ). HuNoV GII in wastewater  
272 solids at both WWTPs was positively correlated to norovirus positivity rates ( $\tau = 0.36$  for OSP  
273 and  $0.26$  for SJ, both  $p < 10^{-4}$ ). HuNoV GI in wastewater solids was not associated with norovirus  
274 positivity rates ( $\tau = 0.16$ ,  $p = 0.014$  for OSP,  $\tau = 0.0067$ ,  $p = 0.92$  for SJ). Rotavirus in  
275 wastewater solids at SJ was positively associated with rotavirus positivity rates ( $\tau = 0.24$ ,  
276  $p = 0.00049$ ); however, rotavirus at OSP was not associated with positivity rate ( $\tau = 0.19$ ,  $p =$   
277  $0.0081$ ).

278

## 279 Discussion

280

281 We detected rotavirus, human adenovirus group F (HAdV), enterovirus (EV), and human  
282 norovirus (HuNoV) genogroups I and II in wastewater solids at two San Francisco Bay Area  
283 WWTPs twice per week for 26 weeks. We observed coherence of the viral target concentrations  
284 between the two WWTPs, suggesting some regional coherence in community infections and  
285 shedding into wastewater. Many of the targets showed temporal coherent patterns within  
286 WWTPs with maxima in concentrations in the winter/spring seasons. Viral enteric infections are

287 usually seasonal with higher rates in the winter months<sup>25</sup>, and seasonal wastewater patterns are  
288 consistent with that despite various behavior changes potentially associated with the COVID-19  
289 pandemic over the course of the study. Temporal variation of the enteric viral targets are distinct  
290 from those of SARS-CoV-2 and other respiratory viruses in wastewater, suggesting divergent  
291 disease dynamics. However, low enteric virus nucleic-acid concentrations in the winter/spring of  
292 2021, relative to the following years may be a result of non-pharmaceutical interventions in  
293 place during the early period of COVID-19 pandemic, particularly prior to 4/14/21 when vaccines  
294 became widely available, which may have limited the spread of enteric viral infections.

295  
296 Concentrations of rotavirus, HAdV, and HuNoV GII in wastewater solids were associated with  
297 clinical positivity rates for infections associated with the viruses. This is despite the biases and  
298 limitations associated with the clinical data; specifically that the tests were administered on  
299 specimens from severely ill individuals, and the individuals tested may not reside or work in the  
300 sewersheds of the two WWTPs. While there is no ground-truth data available to determine  
301 disease occurrence, results suggest that enteric viral nucleic-acid concentrations in wastewater  
302 solids can yield insight into enteric disease activity in contributing communities. The lack of  
303 correlation of HuNoV GI and norovirus positivity rates is consistent with data suggesting HuNoV  
304 GII is the main genogroup causing symptomatic illness in this region<sup>26</sup>. The EV assay used in  
305 this study is a pan-*Enterovirus* genus assay and therefore detects a number of different viruses  
306 including coxsackieviruses, enteroviruses, and echoviruses. The diversity of viruses detected  
307 with the assay, and the diversity of presentations associated with them, including meningitis,  
308 diarrhea, rash, and respiratory symptoms means that there is no clinical metric that can be used  
309 for comparison to the collected wastewater data. However, detection of these viruses in  
310 wastewater suggests occurrence of enterovirus infections in the communities.

311

312 Concentrations of enteric virus nucleic-acid targets are enriched by orders of magnitude in  
313 wastewater solids relative to liquid on mass equivalent basis. These findings are consistent with  
314 previous reports that viruses in wastewater tend to adsorb to wastewater solids<sup>12</sup>. There was  
315 variation in the degree of adsorption among viruses suggesting virus structure might influence  
316 adsorption characteristics. Ye et al.<sup>27</sup> suggest enveloped viruses partition more favorably to  
317 wastewater solids than non-enveloped viruses, but our findings suggest non-enveloped viruses  
318 are enriched in wastewater solids to a similar extent<sup>13</sup>, at least when they are measured using  
319 molecular methods. There are limited data on concentrations of enteric virus nucleic-acids in  
320 wastewater solids<sup>12</sup>, and to our knowledge, no longitudinal measurement of a suite of enteric  
321 viruses measured contemporaneously. However, some of our results are consistent with  
322 observations made in liquid wastewater. For example, HAdV is reported to be among the  
323 highest concentration enteric viruses in wastewater<sup>28</sup>, and herein, it was found at the highest  
324 concentrations in wastewater solids.

325  
326 Rotavirus was detected at the lowest concentration of enteric viruses tested, consistent with the  
327 fact that live, oral rotavirus vaccines are regularly administered to infants in the study area and  
328 the resultant low clinical positivity rates. Based on available rotavirus vaccine sequences, the  
329 rotavirus assay may detect vaccine genomic RNA. As infants in our study area typically wear  
330 diapers, it is unclear to what extent the vaccine strains from infants may appear in wastewater.  
331 However, as vaccine strains are live, transmission to others who do use the wastewater system  
332 may be possible, with their shedding possibly influencing concentrations of rotavirus RNA in the  
333 waste stream.

334  
335 Worldwide there are limited to no direct data on the incidence and prevalence of enteric viral  
336 infections, and the data that do exist are biased to those who are severely ill or to individuals  
337 who seek and obtain diagnostic testing. Wastewater represents a composite biological sample

338 of the entire contributing community and concentrations of enteric virus nucleic-acids can  
339 provide insights into disease occurrence including occurrence of asymptomatic and mild enteric  
340 virus infections. Such information can inform clinical decision making, hospital staffing, or  
341 informational alerts to the public about the circulation of disease. Additional work at WWTPs is  
342 warranted to substantiate these findings. Further work is needed to better characterize viral  
343 shedding characteristics to inform model-based estimates of disease incidence and prevalence  
344 from wastewater measurements<sup>29</sup>.

345 **Acknowledgements.** We acknowledge the numerous people at San Jose and Oceanside  
346 wastewater treatment plants who contributed to wastewater sample collection and Allegra Koch  
347 for her support with literature review. This research was performed on the ancestral and  
348 unceded lands of the Muwekma Ohlone people. We pay our respects to them and their Elders,  
349 past and present, and are grateful for the opportunity to live and work here.

350 **Declaration of interests.** BH, DD, and BW are employees of Verily Life Sciences, LLC.

351  
352 **Data sharing statement.** Wastewater data are available publicly at the Stanford Digital  
353 Repository (<https://doi.org/10.25740/hr647tm4528>). Positivity rate data for clinical specimens  
354 are available upon request.

355  
356 **Author contributions.** Alexandria Boehm: conceptualisation, data curation, formal analysis,  
357 funding acquisition, investigation, methodology, project administration, resources, software,  
358 supervision, validation, visualisation, writing – original draft, writing – review & editing. Bridgette  
359 Hughes: conceptualisation, data curation, formal analysis, investigation, methodology, writing –  
360 original draft, writing – review & editing. Dorothea Duong: conceptualisation, data curation,  
361 formal analysis, investigation, methodology, writing – review & editing. Niaz Banaei: data  
362 curation, methodology, validation, writing – review & editing. Bradley White: conceptualisation,

363 data curation, investigation, methodology, project administration, resources, software,  
364 supervision, validation, writing – review & editing. Marlene Wolfe: conceptualisation, project  
365 administration, writing – review & editing.

366

367

## 368 References

369

370

- 371 1 Bhutta ZA, Sommerfeld J, Lassi ZS, Salam RA, Das JK. Global burden, distribution, and  
372 interventions for infectious diseases of poverty. *Infectious Diseases of Poverty* 2014; **3**: 21.
- 373 2 Lafferty KD. The ecology of climate change and infectious diseases. *Ecology* 2009; **90**: 888–  
374 900.
- 375 3 Troeger C, Forouzanfar M, Rao PC, *et al.* Estimates of global, regional, and national  
376 morbidity, mortality, and aetiologies of diarrhoeal diseases: a systematic analysis for the  
377 Global Burden of Disease Study 2015. *The Lancet Infectious Diseases* 2017; **17**: 909–48.
- 378 4 Kotloff KL, Nataro JP, Blackwelder WC, *et al.* Burden and aetiology of diarrhoeal disease in  
379 infants and young children in developing countries (the Global Enteric Multicenter Study,  
380 GEMS): a prospective, case-control study. *The Lancet* 2013; **382**: 209–22.
- 381 5 Chansaenroj J, Tuanthap S, Thanusuwannasak T, *et al.* Human enteroviruses associated  
382 with and without diarrhea in Thailand between 2010 and 2016. *PLOS ONE* 2017; **12**:  
383 e0182078.
- 384 6 Wu F, Zhang J, Xiao A, *et al.* SARS-CoV-2 Titers in Wastewater Are Higher than Expected  
385 from Clinically Confirmed Cases. *mSystems* 2020; **5**: e00614-20.
- 386 7 Boehm AB, Hughes B, Duong D, *et al.* Wastewater concentrations of human influenza,  
387 metapneumovirus, parainfluenza, respiratory syncytial virus, rhinovirus, and seasonal  
388 coronavirus nucleic-acids during the COVID-19 pandemic: a surveillance study. *The Lancet*  
389 *Microbe* 2023; **4**: e340–8.
- 390 8 Boehm AB, Wolfe MK, White B, *et al.* Human norovirus (HuNoV) GII RNA in wastewater  
391 solids at 145 United States wastewater treatment plants: Comparison to positivity rates of  
392 clinical specimens and modeled estimates of HuNoV GII shedders. *Journal of Exposure*  
393 *Science & Environmental Epidemiology* 2023. DOI:10.1038/s41370-023-00592-4.
- 394 9 Diemert S, Yan T. Clinically Unreported Salmonellosis Outbreak Detected via Comparative  
395 Genomic Analysis of Municipal Wastewater Salmonella Isolates. *Appl Environ Microbiol*  
396 2019; **85**: e00139-19.
- 397 10 Wolfe MK, Yu AT, Duong D, *et al.* Use of Wastewater for Mpox Outbreak Surveillance in  
398 California. *N Engl J Med* 2023; published online Jan 18. DOI:10.1056/NEJMc2213882.
- 399 11 Barber C, Crank K, Papp K, *et al.* Community-Scale Wastewater Surveillance of *Candida*  
400 *auris* during an Ongoing Outbreak in Southern Nevada. *Environ Sci Technol* 2023; **57**: 1755–  
401 63.
- 402 12 Yin Z, Voice T, Tarabara V, Xagorarakis I. Sorption of Human Adenovirus to Wastewater  
403 Solids. *Journal of Environmental Engineering* 2018; **144**: 06018008.
- 404 13 Roldan-Hernandez L, Boehm AB. Adsorption of respiratory syncytial virus (RSV), rhinovirus,  
405 SARS-CoV-2, and F+ bacteriophage MS2 RNA onto wastewater solids from raw wastewater.  
406 *Environmental Science & Technology* 2023.
- 407 14 Jothikumar N, Kang G, Hill VR. Broadly reactive TaqMan® assay for real-time RT-PCR  
408 detection of rotavirus in clinical and environmental samples. *Journal of Virological Methods*



409 2009; **155**: 126–31.

410 15Jothikumar Narayanan, Lowther James A., Henshilwood Kathleen, Lees David N., Hill  
 411 Vincent R., Vinjé Jan. Rapid and Sensitive Detection of Noroviruses by Using TaqMan-Based  
 412 One-Step Reverse Transcription-PCR Assays and Application to Naturally Contaminated  
 413 Shellfish Samples. *Applied and Environmental Microbiology* 2005; **71**: 1870–5.

414 16Loisy F, Atmar RL, Guillon P, Le Cann P, Pommepuy M, Le Guyader F. Real-time RT-PCR  
 415 for norovirus screening in shellfish. *Journal of Virological Methods* 2005; **123**: 1–7.

416 17Gregory JB, Litaker RW, Noble RT. Rapid one-step quantitative reverse transcriptase PCR  
 417 Assay with competitive internal positive control for detection of enteroviruses in  
 418 environmental samples. *Applied and Environmental Microbiology* 2006; **72**: 3960–7.

419 18Boehm AB, Wolfe MK, Wigginton KR, *et al.* Human viral nucleic acids concentrations in  
 420 wastewater solids from Central and Coastal California USA. *Scientific Data* 2023; **10**: 396.

421 19Wolfe MK, Topol A, Knudson A, *et al.* High-Frequency, High-Throughput Quantification of  
 422 SARS-CoV-2 RNA in Wastewater Settled Solids at Eight Publicly Owned Treatment Works in  
 423 Northern California Shows Strong Association with COVID-19 Incidence. *mSystems* 2021; **6**:  
 424 e00829-21.

425 20Topol A, Wolfe M, White B, Wigginton K, Boehm A. High Throughput pre-analytical  
 426 processing of wastewater settled solids for SARS-CoV-2 RNA analyses. *protocols.io* 2021.  
 427 DOI:dx.doi.org/10.17504/protocols.io.btyqnpvw.

428 21Topol A, Wolfe M, Wigginton K, White B, Boehm A. High Throughput RNA Extraction and  
 429 PCR Inhibitor Removal of Settled Solids for Wastewater Surveillance of SARS-CoV-2 RNA.  
 430 *protocols.io* 2021. DOI:dx.doi.org/10.17504/protocols.io.btyrnpv6.

431 22Symonds EM, Nguyen KH, Harwood VJ, Breitbart M. Pepper mild mottle virus: A plant  
 432 pathogen with a greater purpose in (waste)water treatment development and public health  
 433 management. *Water Research* 2018; **144**: 1–12.

434 23Roldan-Hernandez L, Graham KE, Duong D, Boehm AB. Persistence of Endogenous SARS-  
 435 CoV-2 and Pepper Mild Mottle Virus RNA in Wastewater-Settled Solids. *ACS EST Water*  
 436 2022; published online March 11. DOI:10.1021/acsestwater.2c00003.

437 24Borchardt MA, Boehm AB, Salit M, Spencer SK, Wigginton KR, Noble RT. The  
 438 Environmental Microbiology Minimum Information (EMMI) Guidelines: qPCR and dPCR  
 439 Quality and Reporting for Environmental Microbiology. *Environ Sci Technol* 2021; **55**: 10210–  
 440 23.

441 25Fisman D. Seasonality of viral infections: mechanisms and unknowns. *Clinical Microbiology*  
 442 *and Infection* 2012; **18**: 946–54.

443 26Eftim SE, Hong T, Soller J, *et al.* Occurrence of norovirus in raw sewage – A systematic  
 444 literature review and meta-analysis. *Water Research* 2017; **111**: 366–74.

445 27Ye Y, Ellenberg RM, Graham KE, Wigginton KR. Survivability, Partitioning, and Recovery of  
 446 Enveloped Viruses in Untreated Municipal Wastewater. *Environ Sci Technol* 2016; **50**: 5077–  
 447 85.

448 28Katayama H, Haramoto E, Oguma K, *et al.* One-year monthly quantitative survey of  
 449 noroviruses, enteroviruses, and adenoviruses in wastewater collected from six plants in  
 450 Japan. *Water Research* 2008; **42**: 1441–8.

451 29Arts PJ, Kelly JD, Midgley CM, *et al.* Longitudinal and quantitative fecal shedding dynamics  
 452 of SARS-CoV-2, pepper mild mottle virus, and crAssphage. *mSphere* 2023; **0**: e00132-23.

454

| WWTP |        | Rota                | HAdV                | EV                  | HuNoV GI            | HuNoV GII           |
|------|--------|---------------------|---------------------|---------------------|---------------------|---------------------|
| OSP  | median | 1.0x10 <sup>3</sup> | 5.8x10 <sup>5</sup> | 4.1x10 <sup>4</sup> | 2.8x10 <sup>4</sup> | 5.7x10 <sup>5</sup> |
|      | 25th   | 0                   | 4.9x10 <sup>4</sup> | 2.6x10 <sup>4</sup> | 1.2x10 <sup>4</sup> | 3.5x10 <sup>5</sup> |

|    |        |                   |                   |                   |                   |                   |
|----|--------|-------------------|-------------------|-------------------|-------------------|-------------------|
|    | 75th   | $3.2 \times 10^3$ | $1.5 \times 10^6$ | $6.9 \times 10^4$ | $4.7 \times 10^4$ | $1.1 \times 10^6$ |
|    | max    | $7.8 \times 10^4$ | $5.8 \times 10^6$ | $2.4 \times 10^5$ | $2.6 \times 10^5$ | $6.4 \times 10^6$ |
|    | # ND   | 89                | 9                 | 0                 | 0                 | 0                 |
|    | #      | 230               | 230               | 230               | 230               | 230               |
| SJ | median | $3.3 \times 10^3$ | $1.9 \times 10^6$ | $5.4 \times 10^4$ | $3.4 \times 10^4$ | $7.0 \times 10^5$ |
|    | 25th   | $1.5 \times 10^3$ | $5.3 \times 10^5$ | $3.7 \times 10^4$ | $1.6 \times 10^4$ | $3.5 \times 10^5$ |
|    | 75th   | $8.5 \times 10^3$ | $4.3 \times 10^6$ | $7.5 \times 10^4$ | $7.6 \times 10^4$ | $1.5 \times 10^6$ |
|    | max    | $2.7 \times 10^5$ | $8.5 \times 10^7$ | $1.2 \times 10^6$ | $1.4 \times 10^6$ | $1.1 \times 10^8$ |
|    | # ND   | 24                | 0                 | 1                 | 0                 | 0                 |
|    | #      | 229               | 229               | 229               | 229               | 229               |

455 Table 1. Summary statistics for infectious disease targets in OSP and SJ wastewater solids.  
 456 WWTP is wastewater treatment plant. Units of concentration are copies per gram dry weight.  
 457 25th is 25th percentile, 75th is 75th percentile, max is the maximum value, # ND is number of  
 458 non-detect, # is the total number of samples. Units for the concentrations are copies per gram  
 459 dry weight.

460

461

462

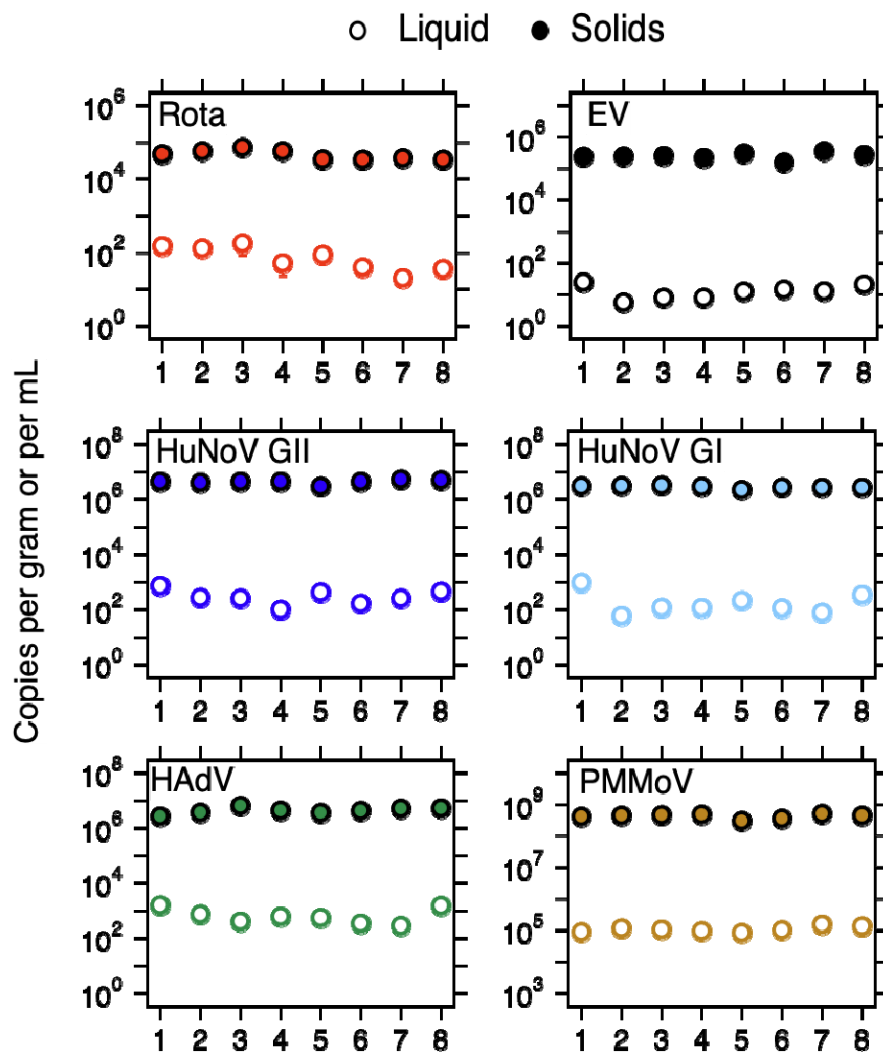

463

464 Figure 1. Concentration of viral targets in wastewater solids and liquid. Error bars are standard  
465 deviations and in most cases cannot be seen because they are smaller than the symbols. The  
466 x-axis shows the sample numbers (1-8) as indicated in the main text. The units on the y-axis are  
467 copies per gram of solids or milliliters of liquid. Rota is rotavirus, HAdV is human adenovirus  
468 group F, HuNoV GI and GII are human norovirus genogroup I and II, respectively, EV is  
469 enterovirus, and PMMoV is pepper mild mottle virus.

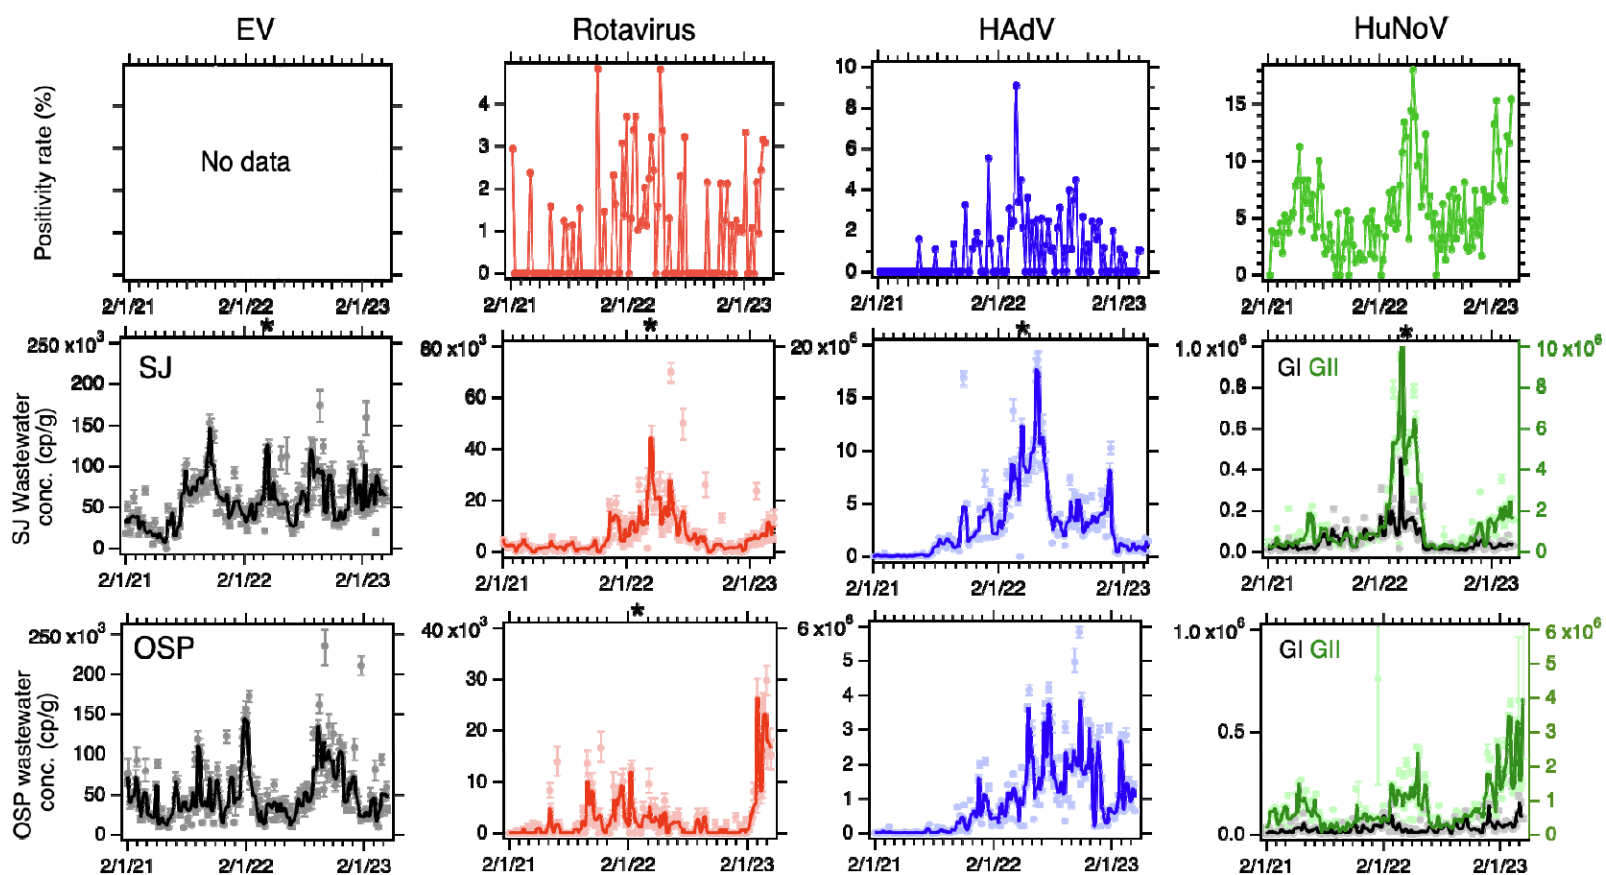

470

471 Figure 2. Positivity rates from the clinical laboratory for rotavirus, adenovirus group F, and norovirus infections (top panels), and  
 472 concentrations of EV, rotavirus, HAdV, and HuNoV GI and GII nucleic-acids in wastewater solids at SJ (middle panels) and OSP  
 473 (bottom panels). Error bars on the wastewater measurements show standard deviations. The solid lines in the wastewater plots  
 474 represent smoothing using the median of 3-adjacent samples. The norovirus plots show GII in green (right axes) and GI in black (left  
 475 axis). A black asterisk at the top of a plot indicates a value at that date that is higher than the y-axis scale. An asterisk on the top axis  
 476 indicates a single data point out of range of the axis: EV at SJ:  $1.2 \times 10^6$  cp/g on 4/14/22, Rota at SJ:  $2.7 \times 10^5$  cp/g on 4/14/22,  
 477 HAdV at SJ:  $85 \times 10^6$  cp/g on 4/14/22, HuNoV GI at SJ:  $1.4 \times 10^6$  cp/g on 4/14/22, HuNoV GII at SJ:  $1 \times 10^8$  cp/g on 4/14/22, and  
 478 Rota at OSP:  $78 \times 10^3$  cp/g on 3/6/23.

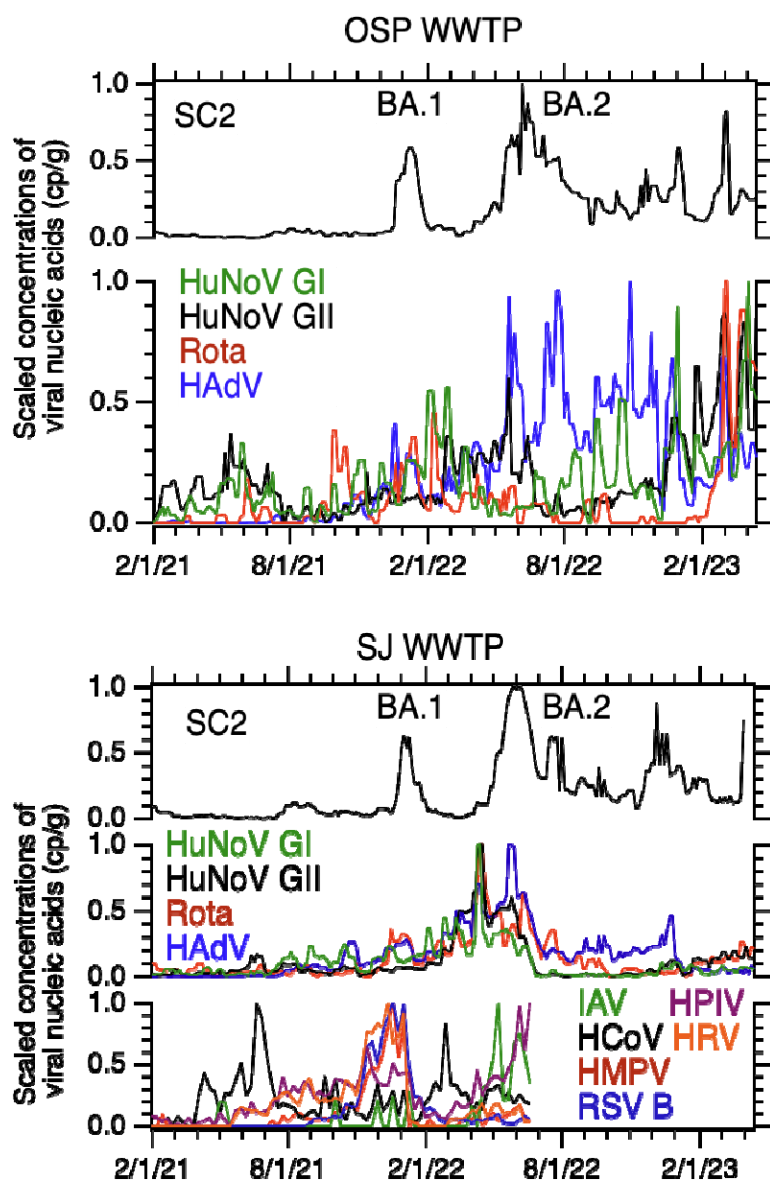

479

480 Figure 3 Standardized virus concentrations. Standardized, 3-sample smoothed (using median)  
 481 concentrations of the HuNoV GI and GII, rotavirus (Rota), and human adenovirus (HAdV) (middle or  
 482 bottom left axis) and SARS-CoV-2 (SC2, top axis) measured in this study in wastewater solids from OSP  
 483 (top plot) and SJ (bottom plot). The BA.1 and BA.2 surges in SC2 concentrations is labeled in each plot  
 484 atop of adjacent, respectively, to the surges. Data from respiratory viruses previous published by Boehm  
 485 et al.<sup>7</sup> at SJ through mid summer 2022 are provided on the bottom of the SJ plot; IAV is influenza A,  
 486 HCoV is seasonal coronaviruses, HMPV is human metapneumovirus, HPIV is human parainfluenza virus,  
 487 HRV is human rhinovirus and RSV B is respiratory syncytial virus B. The dominant SARS-CoV-2 variant  
 488 circulating is provided at the top of the figure near each SARS-CoV-2 surge in concentration. The  
 489 standardized concentration ( $C_{sd}$ ) is calculated using the following formula  $C_{sd}(t) = C(t) - C_{min} / (C_{max} - C_{min})$   
 490 where  $C(t)$  is the smoothed concentration of the viral target, and  $C_{max}$  and  $C_{min}$  are the max and min of the  
 491 smoothed concentrations observed over the duration of the time series.
